# Supplementary material for: Establishment of a system to evaluate the therapeutic effect and the dynamics of an investigational drug on ulcerative colitis using human colonic organoids
Source: Springer Nature journal article supplement (doi:10.1007/s00535-018-01540-y), 2019-01-01
Supplement: MOESM12 [file 16367896]

**Supplementary Table S4**

**List of upregulated genes in the colonic organoids treated with inflammatory reagents and upregulated genes in the colonic organoids treated with inflammatory reagents and KAG**

|  |  | Native vs. Inf (group1 vs 2) | | Inf vs. Inf + KAG(group2 vs 3) | |
| --- | --- | --- | --- | --- | --- |
| Identifiler | Gene title | Fold change | p value | Fold change | p value |
| NR_110429 | LINC01540 | 2.262 | 1.8531 10-2 | 16.837 | 1.9653 10-3 |
| NR_110428 | LINC01540 | 3.236 | 1.0397 10-2 | 15.270 | 2.1896 10-3 |
| NM_033138 | CALD1 | 2.463 | 2.3876 10-1 | 12.395 | 1.1453 10-2 |
| NM_002638 | PI3 | 13.279 | 1.2038 10-3 | 9.240 | 1.4846 10-3 |
| NM_000576 | IL1B | 7.443 | 6.0603 10-4 | 8.978 | 2.0436 10-4 |
| NM_001164586 | IGFN1 | 3.853 | 4.2433 10-1 | 6.869 | 8.1344 10-1 |
| NM_014207 | CD5 | 2.016 | 1.1598 10-1 | 6.414 | 6.3754 10-3 |
| NM_001040147 | SERPINB7 | 6.523 | 3.5622 10-3 | 5.838 | 6.2835 10-3 |
| ENST00000587298 | WFDC21P | 2.731 | 2.2031 10-2 | 5.815 | 9.5965 10-3 |
| NM_000624 | SERPINA5 | 4.852 | 2.2936 10-2 | 5.184 | 1.7917 10-2 |
| NM_178834 | LAYN | 2.614 | 3.5634 10-2 | 5.164 | 6.6320 10-3 |
| NM_152468 | TMC8 | 3.311 | 3.0780 10-4 | 5.053 | 1.1783 10-4 |
| NM_001037341 | PDE4B | 52.977 | 3.2484 10-4 | 4.715 | 3.1287 10-3 |
| NM_004370 | COL12A1 | 2.507 | 4.6080 10-2 | 4.452 | 1.5899 10-2 |
| NR_109959 | LOC101927843 | 3.304 | 3.6779 10-1 | 4.223 | 8.4871 10-1 |
| NM_001130690 | PDE10A | 4.515 | 7.4751 10-4 | 4.205 | 3.6802 10-3 |
| NM_030754 | SAA2 | 129.521 | 5.8142 10-3 | 3.875 | 2.3133 10-2 |
| NM_207322 | C2CD4A | 15.358 | 7.6228 10-6 | 3.818 | 9.7202 10-5 |
| NM_138326 | ACMSD | 3.355 | 3.4188 10-4 | 3.710 | 4.4817 10-4 |
| NM_000331 | SAA1 | 133.185 | 3.7651 10-5 | 3.609 | 3.4096 10-2 |

The expression of genes in the colonic organoids treated with inflammatory reagents for 6 weeks by treatment with or without KAG-308 for 1 week was comprehensively compared by microarray analysis. The genes further upregulated by ≥2-fold by treatment with KAG-308 within the genes upregulated by the inflammation alone are shown. Statistical analysis was performed using the Student's *t*-test (*n* = 3).
